# Supplementary material for: Trans-ethnic meta-analysis of genome-wide association studies identifies maternal ITPR1 as a novel locus influencing fetal growth during sensitive periods in pregnancy
Source: PLoS Genet. 2020 May 14;16(5):e1008747. doi: 10.1371/journal.pgen.1008747 (PMC7252673; doi:10.1371/journal.pgen.1008747)
Supplement: S3 Table — (XLSX) [file pgen.1008747.s003.xlsx]

## Sheet: S3 Table
S3 Table. Associations of rs746039 (ITPR1) with fetal growth measures at 27 weeks and 6 days gestation.								Meta-analysis GWAMA						Mantra			Whites				Blacks				Hispanics				East Asians
Fetal growth measure	SNP	chr:positionhg19	Gene	EA	NEA	Beta	se	P GWAMA	i2	P (Q statistic)	n studies	N	Effect	logBF	EAF	Beta	se	P	EAF	Beta	se	P	EAF	Beta	se	P	EAF	Beta	se	P
Fetal weight 27 weeks	rs746039	3:4794911	ITPR1 (intronic); EGOT (5'upstream))	G	A	-0.267979	0.04825	2.86e-08	0.21	0.284948	4	1849	----	6.21999	0.20765	-0.289	0.076	0.0001519	0.12532	-0.125	0.092	0.1713	0.16282	-0.366	0.086	2.074e-05	0.01629	-0.268	0.572	0.639
Head circumference 27 weeks	rs746039	3:4794911	ITPR1 (intronic); EGOT (5'upstream))	G	A	-0.25757	0.047292	4.85e-08	0	0.43	4	1849	----	6.0889	0.20765	-0.213	0.074	0.004099	0.12532	-0.196	0.089	0.02763	0.16282	-0.366	0.086	1.993e-05	0.01629	-0.667	0.572	0.2438
Abdomial circumference 27 weeks	rs746039	3:4794911	ITPR1 (intronic); EGOT (5'upstream))	G	A	-0.218049	0.048103	5.9e-06	0.57	0.070562	4	1849	p---	3.09899	0.20765	-0.26	0.076	0.0006374	0.12532	-0.024	0.091	0.7928	0.16282	-0.342	0.086	6.851e-05	0.01629	-0.026	0.571	0.9633
Femur length 27 weeks	rs746039	3:4794911	ITPR1 (intronic); EGOT (5'upstream))	G	A	-0.226013	0.049028	4.09e-06	0	0.956357	4	1849	p---	3.7085	0.20765	-0.212	0.077	0.006116	0.12532	-0.202	0.092	0.02904	0.16282	-0.265	0.089	0.002967	0.01629	-0.32	0.581	0.5815
Humerus length 27 weeks	rs746039	3:4794911	ITPR1 (intronic); EGOT (5'upstream))	G	A	-0.208337	0.049006	2.15e-05	0	0.631165	4	1849	----	3.06386	0.20765	-0.189	0.077	0.01455	0.12532	-0.137	0.093	0.1403	0.16282	-0.299	0.088	0.0006643	0.01629	-0.142	0.579	0.8064
EA=Effect Allele
NEA=Non-effect Allele
EAF= Effect Allele Frequency
se= Standard Error
logBF= log10 Bayes factor
Effect= White, Black, Hispanic, East Asian, respectively
